# Supplementary material
Source: publisher figshare collection journal article supplement (https://gsapubs.figshare.com/ndownloader/files/23300960)
Supplement: Supplementary file 1 [file 23300960]

## Sheet: Explanation
Sheets
Summary	all information regarding the modelled olivine compositions, the bounds on the temperature condition, the c-axis orientation, the type of zoning, and the timescales produced by the modelling procedure (for both the glass and olivine temperatures)
EBSD	Data output from EBSD analyses and calculated crystallographic orientations from these.
Crystal Data	Probe data collected on the matrix glass and the calculation of glass temperature. All profiles are from the core of the crystal to the rim, where the final point was chosen to be at the crystal boundary.
Glass Data	Probe data collected on the olivines, in profiles perpendicular to the crystal edge, and the calculation of olivine temperatures based on the correlation seen in data on sheet IR(2014) data
IR(2014) data	correlation between melt inclusion MgO content and forsterite content of the host olivine. Data taken from Sides et al. (2014)
A note on sample names
Ep(x)_(y)_(loc) corresponds the crystal (y) on the analysed stub from episode (x), where the profile was taken from the location (loc) on the crystal. If a compass orientation (e.g. N, NW, SE etc.), it refers to the edge on which the image was taken of the wholegrain image, if (loc) = wholegrain, this refers to a profile obtained from an image of the whole crystal.

## Sheet: Summary
Episode	Crystal #	Edge	Modelled Composition				Temperature		EBSD			Type of Zonation	Timescale from Glass T			Converted into absolute time			Timescale from Olivine T			Converted into absolute time			Time of eruption
			Core	Inter-1	Inter-2	Rim	Glass	Olivine	Angle of Traverse	c-trend	c-plunge	N, R, S													days
1	15	WG	0.862	-	-	0.837	1189.71	1258.7	230	359.5	77.9	N	47.3277			-43.8277			16.7071			-13.2071			3.5
3	2	SW	0.871	-	-	0.817	1117.27	1275.1	255	119.9	1.2	N	49.956			-35.556			4.16838			10.2316			14.4
3	4	WG	0.866	-	-	0.822	1149.77	1263.75	310	134.15	42.8	N	105.639			-91.2386			18.1211			-3.72111			14.4
3	6	N	0.875	-	-	0.828	1147.62	1284.27	100	290.35	66.05	N	27.4965			-13.0965			3.43834			10.9617			14.4
3	12	WG	0.869	-	-	0.827	1147.11	1265.89	45	356.667	69.6667	N	617.627			-603.227			97.9174			-83.5174			14.4
3	16	WG	0.868	-	-	0.832	1159.91	1270.16	125	106.15	54.85	N	74.293			-59.893			13.8096			0.590355			14.4
3	17	WG	0.875	-	-	0.822	1158.06	1274.61	36	265.65	16.9	N	457.359			-442.959			76.6332			-62.2332			14.4
3	23	WG	0.872	0.88	-	0.83	1143.85	1287.12	283	333.75	11.45	R,N		21.2911			-6.89112			2.38752			12.0125		14.4
3	25	E	0.87	-	-	0.828	1153.37	1271.69	62	331.025	8.775	N	200.125			-185.725			32.2028			-17.8028			14.4
5	8	N	0.859	0.867	-	0.8	1160.78	1265.41	60	322.137	10.2375	R,N	397.534	29.798		-375.634	-7.89796		80.6689	6.0467		-58.7689	15.8533		21.9
5	11	N	0.844	0.865	-	0.802	1158.13	1261.5	355	82.95	9.05	R,N		25.5079			-3.6079			5.21718			16.6828		21.9
5	15	SW	0.827	0.859	-	0.817	1155.21	1249.73	148	194.45	1.6	R,N	191.607	3.86301		-169.707	18.037		43.729	0.881624		-21.829	21.0184		21.9
5	18	W	0.872	-	-	0.836	1152.92	1282.3	267	265.05	6.1	N	12.2885			9.61147			1.71771			20.1823			21.9
8	1	SW	0.836	-	-	0.853	1146.58	1234.53	246	198.35	6.2	R	474.446			-448.346			118.176			-92.076			26.1
8	2	NE	0.871	-	-	0.835	1167.42	1279.13	41	301.467	20.5667	N	197.084			-170.984			36.1834			-10.0834			26.1
8	11	E	0.85	-	-	0.868	1170.45	1260.14	65	284	3.4	R	445.505			-419.405			112.518			-86.4184			26.1
8	12	N	0.872	-	-	0.849	1146.73	1276.9	338	244.9	2.83333	N	71.5323			-45.4323			9.70286			16.3971			26.1
10	12	E+SE(1)	0.882	-	-	0.857	1180.19	1310.37	140	157.55	68.25	N	151.506			-121.906			22.398			7.20204			29.6
15	1	SW	0.864	0.804	-	0.825	1140.09	1259.92	252	337.75	41.1	N,R	537.044	16.0046		-504.344	16.6954		82.462	2.45747		-49.762	30.2425		32.7
15	5	WG1	0.869	-	-	0.838	1153.99	1272.39	143	229.367	26.7	N	661.161			-628.461			108.173			-75.4728			32.7
15	10	N	0.88	0.844	-	0.821	1160.44	1292.47	25	292.733	1.6	X,N		25.0975			7.60254			3.42798			29.272		32.7
15	12	NE	0.869	-	-	0.823	1159.6	1274.05	30	327.533	4.33333	N	320.723			-288.023			56.3313			-23.6313			32.7
15	17	SW	0.863	-	-	0.831	1144.09	1255.9	235	106.95	0.3	N	350.384			-317.684			60.9819			-28.2819			32.7
15	22	S	0.849	0.82	0.828	0.822	1159.82	1227.28	180	309.1	8.1	N,R,N	869.889	31.6817	21.7008	-837.189	1.01826	10.9992	303.111	11.0394	7.56158	-270.411	21.6606	25.1384	32.7

## Sheet: EBSD
Episode	Crystal	Data Point	1	2	3	MAD	[100] Trend	[100] Plunge	[010] Trend	[010] Plunge	[001] Trend	[001] Plunge	C-trend (by crystal)	C-Plunge (by crystal)
1	15	3	0	12.2	132	0.739	137.348	9.03541	228.65	8.12909	360	77.8
1	15	4	1	12	130.6	0.549	137.773	9.08278	229.024	7.77617	359	78	359.5	77.9
3	2	3	59.9	91.2	113.8	0.963	27.3815	66.1715	210.629	23.7945	120.1	1.2
3	2	4	60.3	91.2	113.4	0.817	26.9293	66.571	210.219	23.3946	119.7	1.2	119.9	1.2
3	4	1	45.9	133.4	61.5	0.633	275.783	39.682	23.6416	20.2851	134.1	43.4
3	4	2	45.8	132.2	61.4	0.672	275.135	40.5728	24.0856	20.77	134.2	42.2	134.15	42.8
3	6	1	70.7	24.2	11.8	0.575	188.512	4.80861	96.3996	23.657	289.3	65.8
3	6	2	68.6	23.7	14.3	0.757	188.262	5.69775	95.8442	22.923	291.4	66.3	290.35	66.05
3	12	1	2.5	20.1	4.2	0.946	263.555	1.44223	173.029	20.0437	357.5	69.9
3	12	2	4.1	18.9	0.5	0.778	265.427	0.161957	175.372	18.8993	355.9	71.1
3	12	3	3.4	22	2.3	1.144	264.467	0.861396	174.12	21.9814	356.6	68	356.667	69.6667
3	16	4	71.1	144	132	0.526	336.96	25.9005	234.971	23.1603	108.9	54
3	16	5	76.6	145.7	138.4	0.625	337.142	21.9712	236.337	24.9232	103.4	55.7	106.15	54.85
3	17	3	94.4	73.2	83.5	0.82	107.114	72.0203	357.486	6.22146	265.6	16.8
3	17	4	94.3	73	84.7	0.864	103.304	72.2163	357.254	5.0678	265.7	17	265.65	16.9
3	23	3	26.1	80.9	98.6	0.462	110.182	77.5042	242.53	8.49095	333.9	9.1
3	23	6	26.4	76.2	96	0.887	129.82	74.9753	242.164	5.8262	333.6	13.8	333.75	11.45
3	25	1	28.3	86	143.6	0.706	64.6441	36.2972	236.295	53.4111	331.7	4
3	25	2	28.6	81.7	140.7	0.461	68.1385	38.8105	231.398	49.9724	331.4	8.3
3	25	3	29.9	77.2	141.6	0.901	70.0594	37.2801	224.483	49.8375	330.1	12.8
3	25	4	29.1	80	143	0.383	68.355	36.3469	227.923	51.8599	330.9	10	331.025	8.775
5	8	1	38.2	78.8	1.2	0.671	231.567	1.17714	135.645	78.7367	321.8	11.2
5	8	2	37.4	79.1	1.1	0.596	232.392	1.08015	136.802	79.0453	322.6	10.9
5	8	3	38.4	78.7	1.4	0.826	231.326	1.37286	134.49	78.6147	321.6	11.3
5	8	4	38	80.2	2.4	0.769	231.591	2.36496	128.167	79.9132	322	9.8
5	8	5	37	81.5	3.9	0.642	232.423	3.8571	118.24	80.654	323	8.5
5	8	6	37.3	81.2	3.8	0.907	232.118	3.7552	119.232	80.4205	322.7	8.8
5	8	7	38.2	79.3	0.3	0.7	231.744	0.294784	140.185	79.2958	321.8	10.7
5	8	8	38.4	79.3	0.7	0.563	231.47	0.687828	137.835	79.2774	321.6	10.7	322.137	10.2375
5	11	1	97	99.1	39.4	0.609	180.402	38.8101	342.101	49.7301	83	9.1
5	11	2	97.1	99	37.3	0.368	179.696	36.7645	341.296	51.7836	82.9	9	82.95	9.05
5	15	1	165.8	89.5	113.4	0.432	285.355	66.595	103.984	23.3991	194.2	0.5
5	15	2	165.3	87.3	113.9	0.895	290.768	65.9569	103.504	23.8718	194.7	2.7	194.45	1.6
5	18	1	95.4	84	179.4	0.555	354.663	0.596713	90.3212	83.9702	264.6	6
5	18	2	94.5	83.8	4.3	0.37	175.035	4.2748	50.6539	82.4596	265.5	6.2	265.05	6.1
8	1	1	161.5	84.5	110.2	0.765	303.101	69.0948	106.48	20.103	198.5	5.5
8	1	2	161.8	83.1	111	0.347	305.578	67.9442	105.56	20.8408	198.2	6.9	198.35	6.2
8	2	3	59.2	68.3	22.6	0.752	202.05	20.9198	72.4134	59.0687	300.8	21.7
8	2	4	58.4	70.1	26.4	0.53	202.01	24.7138	66.038	57.3761	301.6	19.9
8	2	5	58	69.9	26.8	0.565	202.152	25.0505	66.2287	56.9529	302	20.1	301.467	20.5667
8	11	7	76	86.4	48.6	0.866	189.926	48.4719	17.1685	41.3004	284	3.6
8	11	8	76	86.8	49.2	0.639	190.3	49.0966	16.7586	40.7229	284	3.2	284	3.4
8	12	1	115.9	88.2	64.2	0.627	150.382	64.1416	334.97	25.7863	244.1	1.8
8	12	2	114.1	86.1	66.2	0.967	147.133	65.9009	337.618	23.7415	245.9	3.9
8	12	3	115.3	87.2	63.4	0.997	149.128	63.2637	336.101	26.5658	244.7	2.8	244.9	2.83333
10	12	4	26.3	163.2	109.5	0.978	354	15.8103	262.427	5.53655	153.7	73.2
10	12	5	18.6	153.3	101	0.727	353.675	26.1718	261.251	4.91824	161.4	63.3	157.55	68.25
15	1	1	20.9	77.2	177.8	0.52	69.5876	2.1453	168.937	77.0154	339.1	12.8
15	1	2	23.6	20.6	176.3	0.411	69.864	1.30102	160.352	20.5551	336.4	69.4	337.75	41.1
15	5	5	128.1	58.8	155.9	0.584	334.947	20.4427	92.7109	51.3344	231.9	31.2
15	5	6	132.2	65.8	147.1	0.863	332.652	29.6988	105.44	49.9813	227.8	24.2
15	5	7	131.6	65.3	148.1	0.761	332.98	28.6913	104.525	50.4706	228.4	24.7	229.367	26.7
15	10	1	67	88.1	12.6	0.243	202.575	12.593	31.437	77.2598	293	1.9
15	10	2	67.3	87.7	13.8	0.415	202.135	13.7887	31.9794	76.0133	292.7	2.3
15	10	3	67.5	89.4	11.5	0.511	202.378	11.4994	25.4464	78.4846	292.5	0.6	292.733	1.6
15	12	1	32.8	85.2	0.2	0.464	237.183	0.199299	144.811	85.1958	327.2	4.8
15	12	2	32.4	85.1	180	0.561	57.6	6.99393e-15	147.6	85.1	327.6	4.9
15	12	3	32.2	86.7	1	0.503	237.742	0.998342	130.931	86.552	327.8	3.3	327.533	4.33333
15	17	5	73	90.4	95.8	0.839	13.0683	84.1863	197.041	5.79986	107	0.4
15	17	6	73.1	90.2	96	0.705	14.9978	83.9967	196.921	5.99996	106.9	0.2	106.95	0.3
15	22	1	51.1	82.9	109.6	0.692	58.0426	69.2013	216.38	19.4436	308.9	7.1
15	22	2	50.8	81.4	107.7	0.675	64.3057	70.3817	216.468	17.4945	309.2	8.6
15	22	3	50.8	81.4	107.8	0.79	64.1737	70.2921	216.451	17.5933	309.2	8.6	309.1	8.1

## Sheet: Crystal Data
DataSet/Point	Comment	MgO	Al2O3	SiO2	CaO	TiO2	Cr2O3	MnO	FeO	NiO	P2O5	Total	X	Y	Z		Point#	Date	XMgO	XFeO	Total (non-normalised)	Fo	Mg(melt)	T	MaxT (by crystal)
6 / 1 .	Ep1_15_wholegrain_ctor	46.0598	0.0407	40.3013	0.2777	0.016	0.1016	0.1846	13.0652	0.3492	0.0195	100.415	-13819	-20872	9		26	2013-10-16 16:04:17	0.568869	0.0904976	2.00961	0.862751	10.7693	1230.46	1230.69		Masses
6 / 2 .	Ep1_15_wholegrain_ctor	45.9416	0.035	40.2495	0.281	0.0073	0.0897	0.1328	13.2706	0.3975	0.0012	100.406	-13800.8	-20846.3	9		27	2013-10-16 16:09:42	0.567786	0.0919814	2.00828	0.860585	10.6616	1228.3			MgO	40.29
6 / 3 .	Ep1_15_wholegrain_ctor	46.0719	0.0281	40.2274	0.2836	0.0213	0.0667	0.2275	12.9429	0.3687	0.0185	100.257	-13782.5	-20820.5	9		28	2013-10-16 16:14:51	0.569572	0.0897378	2.00766	0.863891	10.7804	1230.69			Al2O3	101.93
6 / 4 .	Ep1_15_wholegrain_ctor	45.9059	0.0384	40.3181	0.2788	0.0191	0.0919	0.1726	13.2934	0.33	0.0252	100.473	-13764.3	-20794.8	9		29	2013-10-16 16:20:03	0.567187	0.0921139	2.00884	0.860286	10.629	1227.64			SiO2	60.07
6 / 5 .	Ep1_15_wholegrain_ctor	43.3935	0.404	40.3814	0.5106	0.096	0.0554	0.1486	14.8855	0.3118	0.0303	100.217	-13746	-20769	9		30	2013-10-16 16:25:12	0.544616	0.104776	1.97759	0.838656	8.33819	1181.6			CaO	56.07
9 / 1 .	Ep3_2_SW_edge_ctor	46.8853	0.0457	40.5941	0.2808	0.0111	0.0775	0.1526	12.349	0.3925	0	100.789	-16798	-29026	-39		53	2013-10-17 06:42:38	0.574698	0.0848917	2.02488	0.871296	11.522	1245.59	1245.59		TiO2	79.85
9 / 2 .	Ep3_2_SW_edge_ctor	46.8193	0.0435	40.5097	0.2735	0.0093	0.0732	0.1793	12.3266	0.3872	0.0048	100.626	-16787.3	-29021	-39		54	2013-10-17 06:48:01	0.574802	0.0848726	2.02167	0.871342	11.4618	1244.38			Cr2O3	151.99
9 / 3 .	Ep3_2_SW_edge_ctor	46.3209	0.0438	40.3833	0.2723	0.0236	0.042	0.2324	12.7709	0.3475	0.002	100.439	-16776.5	-29016	-39		55	2013-10-17 06:53:11	0.570981	0.0882871	2.01353	0.866083	11.0074	1235.25			MnO	70.92
9 / 4 .	Ep3_2_SW_edge_ctor	45.3251	0.0588	39.8878	0.2771	0.0298	0.0566	0.1378	14.969	0.3174	0.011	101.07	-16765.8	-29011	-39		56	2013-10-17 06:58:21	0.559717	0.10367	2.00989	0.843726	10.0994	1217			FeO	71.84
9 / 5 .	Ep3_2_SW_edge_ctor	43.0034	0.2074	39.8759	0.3737	0.0581	0.063	0.2413	16.9004	0.2817	0.0766	101.081	-16755	-29006	-39		57	2013-10-17 07:03:32	0.537983	0.118575	1.98398	0.819399	7.9825	1174.45			NiO	74.69
10 / 1 .	Ep3_4_wholegrain_ctor	46.1723	0.042	40.5018	0.2824	0.0119	0.0659	0.1391	12.7088	0.3824	0.0177	100.324	-13891	-28918	-20		58	2013-10-17 07:08:49	0.57004	0.0879953	2.01038	0.866276	10.8719	1232.53	1234.19		P2O5	141.89
10 / 2 .	Ep3_4_wholegrain_ctor	46.2632	0.0478	40.5438	0.2833	0.0342	0.121	0.1309	13.0485	0.3516	0.0322	100.856	-13866	-28922	-20		59	2013-10-17 07:14:12	0.568906	0.0899904	2.01836	0.863422	10.9548	1234.19
10 / 3 .	Ep3_4_wholegrain_ctor	46.0032	0.054	40.5583	0.2762	0.0272	0.0484	0.1876	13.5114	0.3098	0.0142	100.99	-13841	-28926	-20		60	2013-10-17 07:19:22	0.565789	0.0931961	2.01807	0.858576	10.7177	1229.43			Mg(melt)=0.9118(Mg)-31.228
10 / 4 .	Ep3_4_wholegrain_ctor	45.0829	0.049	40.3364	0.2707	0.0096	0.0232	0.2155	14.2684	0.3276	0.0219	100.605	-13816	-28930	-20		61	2013-10-17 07:24:33	0.558859	0.0991965	2.00222	0.849258	9.87859	1212.56
10 / 5 .	Ep3_4_wholegrain_ctor	43.157	0.0388	40.4175	0.3148	0.0483	0.1094	0.1791	16.4493	0.2632	0.014	100.991	-13791	-28934	-20		62	2013-10-17 07:29:45	0.539236	0.115267	1.98644	0.823886	8.12255	1177.26
11 / 1 .	Ep3_6_N_edge_ctor	47.1233	0.0424	40.8737	0.2518	0.0293	0.087	0.2184	11.9855	0.392	0.0165	101.02	-11136	-30216	-44		63	2013-10-17 07:34:58	0.575829	0.0821381	2.03116	0.875164	11.739	1249.95	1249.95
11 / 2 .	Ep3_6_N_edge_ctor	47.0706	0.0362	40.7514	0.268	0.0154	0.0888	0.1781	12.2245	0.3987	0.0061	101.038	-11148	-30217.3	-44		64	2013-10-17 07:40:23	0.575327	0.0837968	2.03066	0.872866	11.691	1248.99
11 / 3 .	Ep3_6_N_edge_ctor	46.9105	0.0505	40.835	0.2605	0.0057	0.1115	0.1553	12.2736	0.4048	0	101.007	-11160	-30218.5	-44		65	2013-10-17 07:45:34	0.573977	0.0842224	2.02851	0.872041	11.545	1246.05
11 / 4 .	Ep3_6_N_edge_ctor	46.3494	0.0389	40.3221	0.2661	0.0236	0.0341	0.1803	13.8556	0.377	0.0157	101.463	-11172	-30219.8	-44		66	2013-10-17 07:50:43	0.567294	0.0951088	2.02786	0.856419	11.0334	1235.77
11 / 5 .	Ep3_6_N_edge_ctor	32.2403	4.8961	42.5031	3.0117	0.7902	0.0338	0.2766	15.0607	0.1628	0.1021	99.0774	-11184	-30221	-44		67	2013-10-17 07:55:53	0.435825	0.11418	1.83607	0.792402	-1.83129	977.191
14 / 1 .	Ep3_12_wholegrain_ctor	46.5493	0.0472	40.6096	0.2907	0.0117	0.0848	0.1529	12.7034	0.3753	0	100.825	-7936	-32343	-98		78	2013-10-17 08:53:26	0.571462	0.0874631	2.02176	0.867264	11.2157	1239.43	1239.43
14 / 2 .	Ep3_12_wholegrain_ctor	46.1652	0.0293	40.5709	0.2818	0.0118	0.0872	0.1627	12.8775	0.3608	0.0165	100.564	-7953.3	-32360.3	-98		79	2013-10-17 08:58:49	0.569001	0.0890145	2.01374	0.864723	10.8654	1232.4
14 / 3 .	Ep3_12_wholegrain_ctor	45.2977	0.0282	40.4346	0.2756	0.0076	0.0901	0.1541	13.4755	0.315	0.0052	100.084	-7970.5	-32377.5	-98		80	2013-10-17 09:04:01	0.562906	0.0939151	1.9973	0.857016	10.0744	1216.5
14 / 4 .	Ep3_12_wholegrain_ctor	44.5783	0.042	40.1244	0.2774	0.0115	0.0218	0.1115	14.7854	0.3559	0.0109	100.319	-7987.8	-32394.8	-98		81	2013-10-17 09:09:11	0.555365	0.103304	1.99227	0.843162	9.41849	1203.31
14 / 5 .	Ep3_12_wholegrain_ctor	43.2519	0.0309	40.0072	0.329	0.0541	0.035	0.2402	16.2732	0.2476	0.0103	100.479	-8005	-32412	-98		82	2013-10-17 09:14:23	0.542207	0.11441	1.9799	0.825758	8.20908	1179
16 / 1 .	Ep3_16_wholegrain2_ctor	46.4693	0.0417	40.7361	0.2975	0.0152	0.1019	0.1749	12.8285	0.3686	0.0223	101.056	-15013	-31479	-67		88	2013-10-17 09:45:47	0.569785	0.088217	2.02422	0.865932	11.1427	1237.97	1247.12
16 / 2 .	Ep3_16_wholegrain2_ctor	46.7686	0.0373	40.6382	0.2894	0.0179	0.0732	0.3019	12.5507	0.3555	0.0134	101.046	-15039.3	-31469	-67		89	2013-10-17 09:51:11	0.572567	0.0861729	2.02736	0.869185	11.4156	1243.45
16 / 3 .	Ep3_16_wholegrain2_ctor	46.9685	0.0369	40.6994	0.2777	0.009	0.0693	0.1549	12.7073	0.3618	0.0215	101.306	-15065.5	-31459	-67		90	2013-10-17 09:56:24	0.573351	0.0869958	2.03324	0.868257	11.5979	1247.12
16 / 4 .	Ep3_16_wholegrain2_ctor	45.8457	0.0404	40.3256	0.2642	0.0226	0.0768	0.1495	14.0728	0.3864	0.015	101.199	-15091.8	-31449	-67		91	2013-10-17 10:01:35	0.563766	0.0970536	2.01838	0.853131	10.5741	1226.54
16 / 5 .	Ep3_16_wholegrain2_ctor	27.5983	6.9233	42.6493	4.4313	1.1252	0.0419	0.1544	14.8443	0.118	0.1672	98.053	-15118	-31439	-67		92	2013-10-17 10:06:46	0.387467	0.116881	1.76787	0.768254	-6.06387	892.116
17 / 1 .	Ep3_17_wholegrain1_ctor	46.9728	0.0411	40.7654	0.2668	0.0261	0.089	0.1788	12.3902	0.3577	0.0067	101.095	-16327	-31560	-77		93	2013-10-17 10:11:58	0.574206	0.0849435	2.0304	0.871132	11.6018	1247.2	1247.2
17 / 2 .	Ep3_17_wholegrain1_ctor	46.7256	0.0436	40.6569	0.2567	0.0163	0.0995	0.1357	12.5539	0.3709	0.0124	100.872	-16337.5	-31585.3	-77		94	2013-10-17 10:17:22	0.572951	0.0863321	2.02414	0.869052	11.3764	1242.67
17 / 3 .	Ep3_17_wholegrain1_ctor	45.9914	0.0449	40.3698	0.2581	0.0125	0.0729	0.1568	13.2944	0.3975	0.0289	100.627	-16348	-31610.5	-77		95	2013-10-17 10:22:34	0.567343	0.0919747	2.01203	0.8605	10.707	1229.21
17 / 4 .	Ep3_17_wholegrain1_ctor	44.8402	0.0347	40.1179	0.2606	0.0175	0.0271	0.143	15.2604	0.2862	0.0167	101.004	-16358.5	-31635.8	-77		96	2013-10-17 10:27:47	0.555202	0.105969	2.00456	0.839725	9.65729	1208.11
17 / 5 .	Ep3_17_wholegrain1_ctor	43.4531	0.0282	39.9459	0.3344	0.0584	0.0097	0.1691	16.5635	0.2211	0.015	100.799	-16369	-31661	-77		97	2013-10-17 10:32:58	0.542907	0.116061	1.98654	0.823874	8.39254	1182.69
18 / 1 .	Ep3_23_wholegrain2_ctor	47.051	0.0262	40.8929	0.2575	0.0193	0.0833	0.1649	11.9088	0.3942	0.0186	100.817	-12013	-33078	-95		98	2013-10-17 10:38:10	0.575926	0.0817518	2.0277	0.875696	11.6731	1248.63	1250.53
18 / 2 .	Ep3_23_wholegrain2_ctor	47.1545	0.0458	40.8169	0.2569	0.012	0.0963	0.1208	11.8686	0.4126	0.0183	100.803	-11985.3	-33074.5	-95		99	2013-10-17 10:43:36	0.577039	0.081454	2.02825	0.876302	11.7675	1250.53
18 / 3 .	Ep3_23_wholegrain2_ctor	46.9146	0.0918	40.8547	0.2591	0.0196	0.0306	0.1759	11.8329	0.3999	0.0195	100.599	-11957.5	-33071	-95		100	2013-10-17 10:48:45	0.575537	0.0814118	2.02319	0.876076	11.5487	1246.13
18 / 4 .	Ep3_23_wholegrain2_ctor	46.8304	0.0234	40.8839	0.2611	0.0066	0.0815	0.1722	12.2147	0.3622	0.0046	100.841	-11929.8	-33067.5	-95		101	2013-10-17 10:53:55	0.573771	0.0839314	2.02578	0.872387	11.472	1244.59
18 / 5 .	Ep3_23_wholegrain2_ctor	43.6247	0.0474	40.3454	0.3033	0.0382	0.0266	0.2071	15.8983	0.3009	0.0346	100.826	-11902	-33064	-95		102	2013-10-17 10:59:07	0.54426	0.111239	1.98943	0.830299	8.549	1185.83
19 / 1 .	Ep3_25_E_edge_ctor	46.343	0.0505	40.8714	0.2682	0.0197	0.0907	0.212	12.3628	0.3777	0.0136	100.609	-9413	-33628	-110		103	2013-10-17 11:04:21	0.570275	0.0853194	2.01698	0.869859	11.0275	1235.65	1241.52
19 / 2 .	Ep3_25_E_edge_ctor	46.6633	0.044	40.821	0.2633	0.0072	0.1102	0.1145	12.491	0.3635	0.0761	100.954	-9434.3	-33640	-110		104	2013-10-17 11:09:43	0.572063	0.085881	2.02458	0.869471	11.3196	1241.52
19 / 3 .	Ep3_25_E_edge_ctor	46.5676	0.0618	40.7481	0.2707	0.0244	0.1281	0.197	12.4964	0.376	0.1355	101.005	-9455.5	-33652	-110		105	2013-10-17 11:14:54	0.571207	0.0859658	2.02345	0.869188	11.2323	1239.77
19 / 4 .	Ep3_25_E_edge_ctor	45.5281	0.0488	40.5208	0.2772	0.0286	0.089	0.1147	13.4444	0.309	0.0176	100.378	-9476.8	-33664	-110		106	2013-10-17 11:20:06	0.563889	0.093387	2.00396	0.857918	10.2845	1220.72
19 / 5 .	Ep3_25_E_edge_ctor	44.2095	0.0367	39.7489	0.3346	0.0374	0.0168	0.3132	16.3473	0.2716	0.0236	101.34	-9498	-33676	-110		107	2013-10-17 11:25:17	0.548184	0.113681	2.00167	0.828241	9.08222	1196.55
4 / 1 .	Ep5_8_N_edge_ctor	45.7373	0.0489	40.316	0.2792	0.0177	0.1116	0.2231	13.2918	0.3509	0.0292	100.406	17716	-29827	-79		27	2013-10-17 16:07:26	0.565949	0.0922405	2.00584	0.859857	10.4753	1224.55	1237.06
4 / 2 .	Ep5_8_N_edge_ctor	45.7271	0.0503	40.2975	0.2903	0.0115	0.0763	0.2229	13.3339	0.3186	0.0161	100.344	17697.9	-29834.4	-79		28	2013-10-17 16:12:49	0.565993	0.0925604	2.00524	0.859449	10.466	1224.37
4 / 3 .	Ep5_8_N_edge_ctor	45.6764	0.1032	40.4211	0.2697	0.0171	0.0558	0.1826	13.4064	0.375	0.043	100.55	17679.7	-29841.9	-79		29	2013-10-17 16:18:00	0.564725	0.0929584	2.00751	0.858658	10.4197	1223.44
4 / 4 .	Ep5_8_N_edge_ctor	45.9519	0.0561	40.2509	0.2771	0.0184	0.0352	0.1375	13.3577	0.3375	0.0056	100.428	17661.6	-29849.3	-79		30	2013-10-17 16:23:13	0.567714	0.0925527	2.00898	0.859825	10.6709	1228.49
4 / 5 .	Ep5_8_N_edge_ctor	45.9399	0.0394	40.4501	0.2685	0.0271	0.0636	0.1614	13.1505	0.3303	0.0177	100.448	17643.4	-29856.7	-79		31	2013-10-17 16:28:24	0.567442	0.0910971	2.00942	0.861668	10.66	1228.27
4 / 6 .	Ep5_8_N_edge_ctor	46.1397	0.0644	40.4137	0.2818	0.0056	0.0815	0.1666	12.8782	0.339	0.0274	100.398	17625.3	-29864.1	-79		32	2013-10-17 16:33:35	0.569584	0.0891597	2.01057	0.864652	10.8422	1231.93
4 / 7 .	Ep5_8_N_edge_ctor	46.4199	0.0512	40.2883	0.2841	0.0251	0.0819	0.179	12.6926	0.3743	0.0295	100.426	17607.1	-29871.6	-79		33	2013-10-17 16:38:46	0.572159	0.0877393	2.01368	0.867041	11.0977	1237.06
4 / 8 .	Ep5_8_N_edge_ctor	45.8937	0.0538	40.0562	0.3022	0.0285	0.069	0.1882	14.0421	0.3928	0.0378	101.064	17589	-29879	-79		34	2013-10-17 16:43:57	0.564943	0.0969426	2.01628	0.853536	10.6179	1227.42
5 / 1 .	Ep5_11_N_edge_ctor	44.8576	0.0408	40.1604	0.3614	0.0217	0.0331	0.2372	14.5445	0.3038	0.0404	100.601	15455	-30331	-68		35	2013-10-17 16:49:10	0.556846	0.101258	1.99942	0.846137	9.67316	1208.43	1234.35
5 / 2 .	Ep5_11_N_edge_ctor	45.0604	0.0356	40.2723	0.3569	0.0181	0.0648	0.2487	14.4418	0.2564	0.0193	100.774	15459.1	-30351.7	-68		36	2013-10-17 16:54:35	0.558003	0.100298	2.00429	0.847641	9.85807	1212.15
5 / 3 .	Ep5_11_N_edge_ctor	45.1716	0.0388	40.3188	0.3516	0.0107	0.1034	0.2257	14.0066	0.2926	0.0437	100.564	15463.3	-30372.4	-68		37	2013-10-17 16:59:46	0.559964	0.0973775	2.0022	0.851862	9.95946	1214.19
5 / 4 .	Ep5_11_N_edge_ctor	45.421	0.0373	40.3299	0.3442	0.0157	0.0297	0.1811	13.8576	0.3213	0.0873	100.625	15467.4	-30393.1	-68		38	2013-10-17 17:04:55	0.561991	0.0961594	2.006	0.853895	10.1869	1218.76
5 / 5 .	Ep5_11_N_edge_ctor	45.6291	0.0531	40.3254	0.3309	0.0189	0.0345	0.202	13.7221	0.3346	0.0218	100.672	15471.6	-30413.9	-68		39	2013-10-17 17:10:05	0.563665	0.0950673	2.0092	0.855682	10.3766	1222.57
5 / 6 .	Ep5_11_N_edge_ctor	45.8323	0.0362	40.4596	0.311	0.0162	0.0921	0.2274	13.1319	0.2862	0.0145	100.407	15475.7	-30434.6	-68		40	2013-10-17 17:15:15	0.566586	0.0910442	2.00775	0.861557	10.5619	1226.29
5 / 7 .	Ep5_11_N_edge_ctor	46.272	0.0323	40.5826	0.313	0.0275	0.0974	0.2223	12.852	0.2472	0.0226	100.669	15479.9	-30455.3	-68		41	2013-10-17 17:20:26	0.569553	0.0887192	2.01645	0.865224	10.9628	1234.35
5 / 8 .	Ep5_11_N_edge_ctor	46.074	0.0498	40.7204	0.2918	0.0171	0.0267	0.1763	13.0151	0.3403	0.0456	100.757	15484	-30476	-68		42	2013-10-17 17:25:38	0.567226	0.0898625	2.01606	0.863241	10.7823	1230.72
6 / 1 .	Ep5_15_SW_edge_ctor	43.5593	0.0324	39.7963	0.3275	0.0199	0.023	0.1776	16.0002	0.403	0.0163	100.355	12063	-32997	-54		43	2013-10-17 17:30:54	0.545774	0.112432	1.98094	0.829185	8.48937	1184.64	1222.98
6 / 2 .	Ep5_15_SW_edge_ctor	43.73	0.0452	39.7664	0.3401	0.0257	0.0779	0.1626	15.7504	0.378	0.042	100.318	12053.4	-32987.7	-54		44	2013-10-17 17:36:19	0.547725	0.110638	1.98162	0.831949	8.64501	1187.76
6 / 3 .	Ep5_15_SW_edge_ctor	43.9036	0.0313	39.8635	0.3291	0.0188	0.0183	0.2716	15.5809	0.3595	0.0316	100.408	12043.9	-32978.4	-54		45	2013-10-17 17:41:32	0.548799	0.109229	1.98559	0.834006	8.8033	1190.95
6 / 4 .	Ep5_15_SW_edge_ctor	44.4075	0.0231	40.0081	0.3385	0.0246	0.0311	0.2407	15.1444	0.393	0.0438	100.655	12034.3	-32969.1	-54		46	2013-10-17 17:46:43	0.552543	0.10568	1.99477	0.839447	9.26276	1200.18
6 / 5 .	Ep5_15_SW_edge_ctor	44.5692	0.0376	39.9998	0.3371	0.013	0.0568	0.218	14.6952	0.3924	0.0315	100.351	12024.7	-32959.9	-54		47	2013-10-17 17:51:54	0.555293	0.102682	1.99212	0.843943	9.4102	1203.14
6 / 6 .	Ep5_15_SW_edge_ctor	44.9639	0.0474	39.9787	0.3308	0.0203	0.1289	0.2487	13.8376	0.3797	0.0434	99.9794	12015.1	-32950.6	-54		48	2013-10-17 17:57:05	0.56066	0.096767	1.99052	0.85281	9.77008	1210.38
6 / 7 .	Ep5_15_SW_edge_ctor	45.6516	0.0465	40.1712	0.3277	0.008	0.0514	0.1115	13.3126	0.3304	0.0299	100.041	12005.6	-32941.3	-54		49	2013-10-17 18:02:15	0.566518	0.0926513	2.00007	0.859442	10.3971	1222.98
6 / 8 .	Ep5_15_SW_edge_ctor	45.4116	0.0606	39.7618	0.3062	0.0501	0.0988	0.2134	13.4221	0.4143	0.1491	99.8881	11996	-32932	-54		50	2013-10-17 18:07:26	0.565591	0.0937534	1.99282	0.857808	10.1783	1218.58
7 / 1 .	Ep5_18_W_edge_ctor	46.6496	0.0634	40.5395	0.2687	0.0159	0.0447	0.1233	11.9524	0.4306	0.0219	100.11	12768	-29973	-62		51	2013-10-17 18:12:41	0.575282	0.0826645	2.01266	0.87436	11.3071	1241.27	1241.27
7 / 2 .	Ep5_18_W_edge_ctor	46.6022	0.0592	40.6636	0.2686	0.0233	0.1051	0.1876	12.2406	0.401	0.0194	100.57	12791.3	-29971.3	-62		52	2013-10-17 18:18:02	0.573034	0.0844127	2.0185	0.871605	11.2639	1240.4
7 / 3 .	Ep5_18_W_edge_ctor	46.2497	0.0528	40.5479	0.2673	0.0136	0.0956	0.1873	12.1488	0.3789	0.0355	99.9775	12814.5	-29969.5	-62		53	2013-10-17 18:23:16	0.572218	0.0842979	2.00609	0.871598	10.9425	1233.94
7 / 4 .	Ep5_18_W_edge_ctor	46.1143	0.0623	40.6526	0.2767	0.0207	0.0503	0.1781	12.3474	0.4162	0.024	100.142	12837.8	-29967.8	-62		54	2013-10-17 18:28:26	0.57012	0.0856125	2.00758	0.86944	10.819	1231.46
7 / 5 .	Ep5_18_W_edge_ctor	44.0073	0.0427	40.3878	0.295	0.023	0.0921	0.1649	14.8527	0.3844	0.0437	100.293	12861	-29966	-62		55	2013-10-17 18:33:38	0.550062	0.104117	1.98571	0.840843	8.89786	1192.85
9 / 1 .	Ep8_1_SW_edge_ctor	44.1939	0.032	40.0124	0.3214	0.0077	0	0.1179	15.348	0.25	0.0738	100.357	6342	-27689	-48		61	2013-10-17 19:05:07	0.551673	0.107449	1.9883	0.836982	9.068	1196.27	1208.48
9 / 2 .	Ep8_1_SW_edge_ctor	44.2305	0.0375	39.9792	0.325	0.0241	0.049	0.1584	15.5758	0.2645	0.0304	100.674	6361	-27683.7	-48		62	2013-10-17 19:10:30	0.550847	0.10879	1.99294	0.835075	9.10137	1196.94
9 / 3 .	Ep8_1_SW_edge_ctor	44.198	0.042	39.922	0.3146	0.0124	0.0371	0.214	15.4055	0.2462	0.0507	100.443	6380	-27678.3	-48		63	2013-10-17 19:15:41	0.551498	0.107807	1.98912	0.836484	9.07174	1196.34
9 / 4 .	Ep8_1_SW_edge_ctor	44.1174	0.0234	40.0385	0.3248	0.0097	0.0502	0.19	15.0668	0.2735	0.0485	100.143	6399	-27673	-48		64	2013-10-17 19:20:50	0.551799	0.105687	1.98441	0.839255	8.99825	1194.86
9 / 5 .	Ep8_1_SW_edge_ctor	44.1417	0.0222	40.0275	0.3178	0.0183	0.0321	0.2669	15.4096	0.2279	0.0494	100.513	6418	-27667.7	-48		65	2013-10-17 19:26:02	0.550571	0.107792	1.98993	0.836273	9.0204	1195.31
9 / 6 .	Ep8_1_SW_edge_ctor	44.2433	0.0328	39.8784	0.317	0.0125	0.0439	0.2281	15.0699	0.2442	0.0221	100.092	6437	-27662.3	-48		66	2013-10-17 19:31:12	0.55326	0.105687	1.98482	0.839612	9.11304	1197.17
9 / 7 .	Ep8_1_SW_edge_ctor	44.4902	0.0349	40.0989	0.323	0	0.011	0.2102	14.9912	0.3055	0.0253	100.49	6456	-27657	-48		67	2013-10-17 19:36:24	0.553823	0.104658	1.99387	0.841061	9.33816	1201.7
9 / 8 .	Ep8_1_SW_edge_ctor	44.5982	0.0306	40.1069	0.3219	0.0145	0.0493	0.1777	14.6353	0.3236	0.0224	100.281	6475	-27651.7	-48		68	2013-10-17 19:41:34	0.555726	0.102276	1.99186	0.844565	9.43664	1203.68
9 / 9 .	Ep8_1_SW_edge_ctor	44.8602	0.0325	40.2826	0.3169	0.0139	0.0079	0.1938	13.9836	0.3612	0.0455	100.098	6494	-27646.3	-48		69	2013-10-17 19:46:45	0.558738	0.0976781	1.99276	0.851195	9.67553	1208.48
9 / 10 .	Ep8_1_SW_edge_ctor	44.6032	0.0412	40.5819	0.3414	0.0294	0.0695	0.1676	14.0745	0.3484	0.0235	100.281	6513	-27641	-48		70	2013-10-17 19:51:56	0.555455	0.0982985	1.99306	0.84964	9.4412	1203.77
10 / 1 .	Ep8_2_NE_edge_ctor	46.4329	0.0476	40.5071	0.2762	0.0223	0.1114	0.2087	12.3235	0.3823	0.0093	100.322	5907	-26508	-48		71	2013-10-17 19:57:12	0.572549	0.085222	2.01287	0.870438	11.1095	1237.3	1241.93
10 / 2 .	Ep8_2_NE_edge_ctor	46.6855	0.0479	40.6226	0.2718	0.0276	0.087	0.1808	12.1044	0.3819	0.0207	100.43	5892.9	-26520.7	-48		72	2013-10-17 20:02:35	0.574335	0.0835137	2.01753	0.87305	11.3398	1241.93
10 / 3 .	Ep8_2_NE_edge_ctor	46.5904	0.0576	40.5073	0.2765	0.0262	0.0806	0.1383	12.2382	0.3973	0.018	100.33	5878.8	-26533.3	-48		73	2013-10-17 20:07:47	0.573936	0.0845504	2.01482	0.871599	11.2531	1240.19
10 / 4 .	Ep8_2_NE_edge_ctor	46.5306	0.0394	40.5229	0.2692	0.0127	0.0633	0.1514	12.2675	0.4153	0.0161	100.288	5864.7	-26546	-48		74	2013-10-17 20:13:00	0.573483	0.0847948	2.01382	0.871187	11.1986	1239.09
10 / 5 .	Ep8_2_NE_edge_ctor	46.5239	0.0482	40.5375	0.2644	0.0112	0.1228	0.1426	12.4474	0.4039	0.0105	100.512	5850.6	-26558.7	-48		75	2013-10-17 20:18:13	0.572651	0.0859257	2.01646	0.869528	11.1925	1238.97
10 / 6 .	Ep8_2_NE_edge_ctor	46.462	0.0394	40.4258	0.2618	0.0055	0.0628	0.1331	12.4035	0.3925	0.0282	100.215	5836.4	-26571.3	-48		76	2013-10-17 20:23:26	0.573244	0.0858256	2.01169	0.869778	11.1361	1237.83
10 / 7 .	Ep8_2_NE_edge_ctor	46.5971	0.0451	40.5557	0.2668	0.012	0.0621	0.1423	12.2502	0.399	0.0007	100.331	5822.3	-26584	-48		77	2013-10-17 20:28:38	0.573876	0.0846123	2.01532	0.871505	11.2592	1240.31
10 / 8 .	Ep8_2_NE_edge_ctor	46.2082	0.0281	40.5388	0.2665	0	0.0748	0.2467	12.2099	0.4166	0.0256	100.015	5808.2	-26596.7	-48		78	2013-10-17 20:33:49	0.571597	0.0847059	2.00647	0.870935	10.9046	1233.18
10 / 9 .	Ep8_2_NE_edge_ctor	45.8925	0.0571	40.3213	0.2673	0.0154	0.0977	0.163	13.6793	0.3914	0.0188	100.904	5794.1	-26609.3	-48		79	2013-10-17 20:38:59	0.565416	0.0945195	2.01454	0.856775	10.6168	1227.4
10 / 10 .	Ep8_2_NE_edge_ctor	44.8745	0.0557	39.6881	0.312	0.0383	0.0908	0.1699	15.7828	0.3213	0.0327	101.366	5780	-26622	-48		80	2013-10-17 20:44:10	0.554594	0.109393	2.00829	0.835248	9.68857	1208.74
1 / 1 .	Ep8_11_E_edge_ctor	44.9144	0.0368	40.3115	0.2821	0.0109	0.0563	0.207	14.0612	0.3018	0.0265	100.209	11705	-27902	-61		1	2013-10-18 00:06:58	0.55889	0.0981283	1.99463	0.850646	9.72495	1209.47	1241.43
1 / 2 .	Ep8_11_E_edge_ctor	45.0758	0.0245	40.2938	0.2969	0.0098	0.0432	0.1757	13.9622	0.3326	0.0047	100.219	11681.3	-27910.7	-61		2	2013-10-18 00:12:22	0.560282	0.0973303	1.99682	0.851994	9.87211	1212.43
1 / 3 .	Ep8_11_E_edge_ctor	45.3251	0.0279	40.279	0.2913	0.0158	0.1005	0.1736	14.1372	0.3472	0.011	100.709	11657.6	-27919.4	-61		3	2013-10-18 00:17:34	0.560861	0.0981094	2.0058	0.851117	10.0994	1217
1 / 4 .	Ep8_11_E_edge_ctor	45.3209	0.0314	40.3169	0.2904	0.0066	0.0529	0.1994	13.968	0.321	0.0426	100.55	11633.9	-27928.1	-61		4	2013-10-18 00:22:43	0.561369	0.0970321	2.00379	0.852625	10.0956	1216.92
1 / 5 .	Ep8_11_E_edge_ctor	45.2548	0.0416	40.3608	0.2887	0.0106	0.0699	0.1861	13.7797	0.305	0.021	100.318	11610.1	-27936.9	-61		5	2013-10-18 00:27:55	0.56163	0.0959084	1.99994	0.85414	10.0353	1215.71
1 / 6 .	Ep8_11_E_edge_ctor	45.4436	0.0384	40.418	0.2913	0.0216	0.0694	0.1962	13.5407	0.3205	0.0165	100.356	11586.4	-27945.6	-61		6	2013-10-18 00:33:08	0.563191	0.0941142	2.00272	0.856818	10.2075	1219.17
1 / 7 .	Ep8_11_E_edge_ctor	46.0913	0.0259	40.3814	0.2902	0.0131	0.058	0.1466	13.33	0.389	0.0333	100.759	11562.7	-27954.3	-61		7	2013-10-18 00:38:19	0.567662	0.0920729	2.01526	0.86044	10.798	1231.04
1 / 8 .	Ep8_11_E_edge_ctor	46.6584	0.0554	40.1023	0.3156	0.0449	0.0668	0.1719	13.0306	0.3431	0.0217	100.811	11539	-27963	-61		8	2013-10-18 00:43:30	0.572906	0.0897324	2.02138	0.864583	11.3151	1241.43
2 / 1 .	Ep8_12_N_edge_ctor	46.4253	0.0492	40.6118	0.2762	0.02	0.0674	0.1546	12.2634	0.3803	0.0402	100.288	15605	-28000	-73		9	2013-10-18 00:48:44	0.5725	0.084813	2.01271	0.87097	11.1026	1237.16	1242.71
2 / 2 .	Ep8_12_N_edge_ctor	46.4046	0.0463	40.5571	0.2851	0.0143	0.0732	0.2124	12.3711	0.4098	0.0747	100.448	15612.6	-28017.4	-73		10	2013-10-18 00:54:08	0.571783	0.0854888	2.01434	0.869934	11.0837	1236.78
2 / 3 .	Ep8_12_N_edge_ctor	46.5302	0.0513	40.566	0.2796	0.023	0.101	0.1538	12.1663	0.4105	0.0609	100.343	15620.2	-28034.8	-73		11	2013-10-18 00:59:22	0.573403	0.0840843	2.01408	0.872113	11.1982	1239.08
2 / 4 .	Ep8_12_N_edge_ctor	46.7282	0.0548	40.7193	0.2937	0.0161	0.1235	0.1693	12.2416	0.3481	0.083	100.777	15627.8	-28052.2	-73		12	2013-10-18 01:04:33	0.573451	0.0842533	2.02248	0.871898	11.3788	1242.71
2 / 5 .	Ep8_12_N_edge_ctor	46.3197	0.0536	40.6188	0.2896	0.0077	0.064	0.1554	12.7293	0.3656	0.0423	100.646	15635.4	-28069.6	-73		13	2013-10-18 01:09:43	0.570088	0.0878642	2.01663	0.866458	11.0063	1235.23
2 / 6 .	Ep8_12_N_edge_ctor	44.4873	0.0428	40.3893	0.3155	0.0288	0.1143	0.1994	14.6579	0.3322	0.0706	100.638	15643	-28087	-73		14	2013-10-18 01:14:54	0.553334	0.102248	1.9955	0.844035	9.33552	1201.64
14 / 1 .	Ep10_12_E and SE_edge1_ctor	47.2848	0.0552	40.689	0.2538	0.0163	0.0721	0.1071	11.434	0.4071	0.019	100.338	14803	-20428	-86		102	2013-10-18 08:54:13	0.580142	0.078676	2.02297	0.88058	11.8863	1252.91	1255.03
14 / 2 .	Ep10_12_E and SE_edge1_ctor	47.3747	0.0529	40.7915	0.2691	0.0178	0.1296	0.0994	10.9884	0.4189	0.0315	100.174	14754.3	-20395	-86		103	2013-10-18 08:59:36	0.581671	0.0756652	2.02149	0.884891	11.9683	1254.56
14 / 3 .	Ep10_12_E and SE_edge1_ctor	47.4005	0.0512	40.6468	0.2636	0.0088	0.0377	0.1395	11.4003	0.4423	0.0277	100.418	14705.5	-20362	-86		104	2013-10-18 09:04:45	0.580843	0.0783471	2.02548	0.881146	11.9918	1255.03
14 / 4 .	Ep10_12_E and SE_edge1_ctor	47.288	0.0622	40.5508	0.2709	0.0025	0.079	0.17	11.685	0.4028	0.0223	100.534	14656.8	-20329	-86		105	2013-10-18 09:09:57	0.579502	0.0803089	2.02534	0.878285	11.8892	1252.97
14 / 5 .	Ep10_12_E and SE_edge1_ctor	45.5952	0.0425	39.8251	0.3219	0.02	0.0686	0.1356	13.6392	0.3473	0.0262	100.022	14608	-20296	-86		106	2013-10-18 09:15:08	0.566371	0.0950172	1.99812	0.856337	10.3457	1221.95
10 / 1 .	Ep15_1_SW_edge_ctor	46.0706	0.0416	40.7283	0.2713	0.0202	0.0615	0.1616	12.8781	0.3542	0.0052	100.593	-4123	-27040	-68		46	2013-10-16 17:50:00	0.567844	0.0890201	2.01371	0.864477	10.7792	1230.66	1230.66
10 / 2 .	Ep15_1_SW_edge_ctor	45.9406	0.0528	40.4974	0.2716	0.0219	0.1182	0.1323	13.2554	0.3357	0.0993	100.725	-4091.8	-27031.5	-68		47	2013-10-16 17:55:25	0.56661	0.0916877	2.0124	0.86072	10.6606	1228.28
10 / 3 .	Ep15_1_SW_edge_ctor	44.9869	0.0494	40.4982	0.2715	0.0286	0.082	0.1589	14.0036	0.3358	0.0588	100.474	-4060.5	-27023	-68		48	2013-10-16 18:00:35	0.55855	0.0975095	1.99906	0.851371	9.79106	1210.8
10 / 4 .	Ep15_1_SW_edge_ctor	40.9643	0.0626	39.3742	0.2565	0.0227	0.0917	0.2147	19.0232	0.2932	0.1125	100.415	-4029.3	-27014.5	-68		49	2013-10-16 18:05:50	0.521181	0.135737	1.95083	0.793373	6.12325	1137.08
10 / 5 .	Ep15_1_SW_edge_ctor	22.5648	7.5797	46.6869	5.5834	1.5842	0.0277	0.2194	13.6411	0.1363	0.1845	98.2081	-3998	-27006	-68		50	2013-10-16 18:11:02	0.324234	0.109928	1.72733	0.746805	-10.6534	799.866
12 / 1 .	Ep15_5_wholegrain1_ctor	46.3688	0.0422	40.7411	0.266	0.0149	0.0528	0.1541	12.3814	0.3566	0.0172	100.395	-7958	-26774	-23		81	2013-10-16 20:52:11	0.571378	0.0855655	2.01421	0.869752	11.0511	1236.13	1238.22
12 / 2 .	Ep15_5_wholegrain1_ctor	46.4832	0.0499	40.8904	0.2656	0.0245	0.0951	0.1493	12.3663	0.3934	0.0031	100.721	-7986.3	-26762.8	-23		82	2013-10-16 20:57:37	0.571113	0.0852112	2.02012	0.870169	11.1554	1238.22
12 / 3 .	Ep15_5_wholegrain1_ctor	46.3549	0.0427	40.5858	0.267	0.024	0.0602	0.099	12.8527	0.3896	0.1048	100.781	-8014.5	-26751.5	-23		83	2013-10-16 21:02:47	0.570047	0.0886422	2.01831	0.865426	11.0384	1235.87
12 / 4 .	Ep15_5_wholegrain1_ctor	45.5494	0.0346	40.509	0.2657	0.0111	0.1142	0.1867	13.9294	0.3535	0.0264	100.98	-8042.8	-26740.3	-23		84	2013-10-16 21:07:58	0.561809	0.096354	2.01232	0.853602	10.3039	1221.11
12 / 5 .	Ep15_5_wholegrain1_ctor	45.1386	0.0473	38.7596	0.3116	0	0.0353	0.2297	15.0403	0.3013	0.0175	99.8811	-8071	-26729	-23		85	2013-10-16 21:13:10	0.563385	0.10528	1.98859	0.842552	9.92938	1213.58
14 / 1 .	Ep15_10_N_edge_ctor	47.0344	0.0361	40.8927	0.2725	0.0098	0.0654	0.1599	11.9137	0.4068	0.0146	100.806	-9885	-27295	-11		94	2013-10-16 22:00:18	0.575766	0.0817914	2.02755	0.875613	11.658	1248.33	1250.84
14 / 2 .	Ep15_10_N_edge_ctor	47.1717	0.0404	40.9841	0.2772	0.0101	0.1065	0.1523	11.729	0.3996	0.0081	100.879	-9887.1	-27325.9	-11		95	2013-10-16 22:05:40	0.576733	0.0804239	2.03006	0.877618	11.7832	1250.84
14 / 3 .	Ep15_10_N_edge_ctor	46.9423	0.0452	40.9379	0.2729	0.0085	0.001	0.1489	11.7894	0.3915	0.0218	100.559	-9889.2	-27356.8	-11		96	2013-10-16 22:10:49	0.57575	0.0810947	2.02364	0.876539	11.574	1246.64
14 / 4 .	Ep15_10_N_edge_ctor	47.0198	0.0473	41.0028	0.2721	0.0133	0.0684	0.1358	11.7099	0.3745	0.0036	100.648	-9891.3	-27387.7	-11		97	2013-10-16 22:16:03	0.576169	0.0804736	2.02551	0.877447	11.6447	1248.06
14 / 5 .	Ep15_10_N_edge_ctor	46.9632	0.0569	40.7937	0.2661	0.0159	0.048	0.1746	11.6338	0.4264	0.0165	100.395	-9893.4	-27418.6	-11		98	2013-10-16 22:21:12	0.576822	0.0801376	2.02078	0.878017	11.593	1247.02
14 / 6 .	Ep15_10_N_edge_ctor	46.7667	0.0484	41.0054	0.2729	0.0184	0.0599	0.1858	11.5447	0.4527	0.0093	100.364	-9895.6	-27449.5	-11		99	2013-10-16 22:26:23	0.574974	0.0796021	2.01879	0.878391	11.4139	1243.42
14 / 7 .	Ep15_10_N_edge_ctor	46.5293	0.0339	40.7916	0.263	0.0087	0.0494	0.1945	12.5926	0.4174	0.0113	100.892	-9897.7	-27480.3	-11		100	2013-10-16 22:31:33	0.570842	0.0866434	2.02308	0.86822	11.1974	1239.07
14 / 8 .	Ep15_10_N_edge_ctor	45.3712	0.0401	40.5106	0.2616	0.0202	0.0366	0.1829	13.8927	0.3232	0.0324	100.671	-9899.8	-27511.2	-11		101	2013-10-16 22:36:43	0.561212	0.096375	2.00658	0.853441	10.1415	1217.84
14 / 9 .	Ep15_10_N_edge_ctor	44.3176	0.05	40.1285	0.282	0.0112	0.0815	0.1963	14.7879	0.3795	0.132	100.367	-9901.9	-27542.1	-11		102	2013-10-16 22:41:53	0.553076	0.103501	1.98881	0.842362	9.18079	1198.53
14 / 10 .	Ep15_10_N_edge_ctor	43.0542	0.0373	40.1084	0.345	0.0207	0.0263	0.2226	17.1424	0.2825	0.0177	101.257	-9904	-27573	-11		103	2013-10-16 22:47:04	0.537281	0.119974	1.98892	0.817462	8.02882	1175.38
16 / 1 .	Ep15_12_NE_edge_ctor	46.3781	0.0276	40.4523	0.2822	0.0179	0.1008	0.1525	12.8327	0.3747	0.0126	100.632	-12049	-25931	12		114	2013-10-16 23:44:19	0.570815	0.0885791	2.0166	0.865666	11.0596	1236.3	1240.31
16 / 2 .	Ep15_12_NE_edge_ctor	46.5969	0.0299	40.4716	0.284	0.0111	0.0068	0.1919	12.4181	0.3457	0.017	100.373	-12069.1	-25946.9	12		115	2013-10-16 23:49:42	0.573642	0.0857373	2.01613	0.869973	11.2591	1240.31
16 / 3 .	Ep15_12_NE_edge_ctor	46.3804	0.0285	40.5158	0.2811	0.0223	0.0744	0.1743	12.2603	0.3417	0.0035	100.082	-12089.3	-25962.7	12		116	2013-10-16 23:54:54	0.572884	0.0849305	2.00942	0.87089	11.0616	1236.34
16 / 4 .	Ep15_12_NE_edge_ctor	46.2508	0.0313	40.4115	0.2806	0.0067	0.0884	0.1702	13.2518	0.3597	0.0018	100.853	-12109.4	-25978.6	12		117	2013-10-17 00:00:04	0.568754	0.0913926	2.01836	0.861557	10.9435	1233.96
16 / 5 .	Ep15_12_NE_edge_ctor	45.7427	0.0316	40.2963	0.2572	0.0038	0.0691	0.1548	13.9937	0.3334	0.0229	100.905	-12129.6	-25994.4	12		118	2013-10-17 00:05:15	0.563958	0.0967584	2.01316	0.853555	10.4802	1224.65
16 / 6 .	Ep15_12_NE_edge_ctor	44.955	0.0352	39.9681	0.2588	0.0137	0.1087	0.2762	14.8373	0.3114	0.0136	100.778	-12149.7	-26010.3	12		119	2013-10-17 00:10:26	0.557423	0.103179	2.00168	0.84381	9.76197	1210.22
16 / 7 .	Ep15_12_NE_edge_ctor	44.108	0.0318	39.8166	0.2942	0.0323	0.062	0.2041	16.07	0.2668	0.0272	100.913	-12169.9	-26026.1	12		120	2013-10-17 00:15:39	0.548945	0.112165	1.9943	0.830338	8.98967	1194.69
16 / 8 .	Ep15_12_NE_edge_ctor	41.1185	1.9451	40.8192	1.2958	0.3034	0.0582	0.1789	16.273	0.2514	0.0358	102.279	-12190	-26042	12		121	2013-10-17 00:20:48	0.515664	0.114453	1.97912	0.818362	6.26385	1139.9
19 / 1 .	Ep15_17_SW_edge_ctor	46.2633	0.0287	40.4309	0.2723	0.0189	0.0835	0.179	13.1467	0.356	0.0255	100.805	-16354	-26727	-9		132	2013-10-17 01:18:33	0.569088	0.0906965	2.01771	0.862536	10.9549	1234.19	1234.19
19 / 2 .	Ep15_17_SW_edge_ctor	46.0064	0.0404	40.4038	0.271	0.0201	0.0069	0.1457	13.5292	0.3852	0.0104	100.819	-16342.8	-26703.5	-9		133	2013-10-17 01:23:58	0.566514	0.0934319	2.01563	0.858425	10.7206	1229.48
19 / 3 .	Ep15_17_SW_edge_ctor	45.3437	0.0472	40.2255	0.2623	0.0327	0.0457	0.142	14.1636	0.3127	0	100.576	-16331.5	-26680	-9		134	2013-10-17 01:29:11	0.561517	0.0983673	2.00427	0.850933	10.1164	1217.34
19 / 4 .	Ep15_17_SW_edge_ctor	44.0562	0.0527	40.0314	0.2592	0.0252	0.0827	0.219	15.771	0.2754	0.0178	100.791	-16320.3	-26656.5	-9		135	2013-10-17 01:34:22	0.548846	0.110188	1.99232	0.832804	8.94244	1193.74
19 / 5 .	Ep15_17_SW_edge_ctor	42.1185	0.029	39.9152	0.2934	0.0296	0.067	0.2912	16.2968	0.2728	0.0105	99.3241	-16309	-26633	-9		136	2013-10-17 01:39:34	0.535855	0.116281	1.95087	0.821692	7.17565	1158.23
4 / 1 .	Ep15_22_S_edge_ctor	45.4401	0.0297	40.008	0.2794	0.012	0.0768	0.2657	14.6458	0.3405	0.0172	101.115	-18468	-26795	-33		21	2013-10-17 03:55:24	0.560529	0.101322	2.01207	0.846911	10.2043	1219.11	1219.11
4 / 2 .	Ep15_22_S_edge_ctor	44.1956	0.0251	39.6713	0.264	0.0159	0.0767	0.2161	16.0224	0.3146	0.0348	100.837	-18488.5	-26754.5	-33		22	2013-10-17 04:00:50	0.550244	0.111875	1.99355	0.831034	9.06955	1196.3
4 / 3 .	Ep15_22_S_edge_ctor	43.4649	0.046	39.5536	0.2635	0.0082	0.0243	0.2501	16.8905	0.3219	0	100.823	-18509	-26714	-33		23	2013-10-17 04:06:02	0.543306	0.118408	1.98562	0.821059	8.4033	1182.91
4 / 4 .	Ep15_22_S_edge_ctor	43.8419	0.0407	39.5236	0.2974	0.0275	0.0455	0.2259	16.3755	0.3192	0.0335	100.731	-18529.5	-26673.5	-33		24	2013-10-17 04:11:11	0.547335	0.114654	1.9881	0.826804	8.74704	1189.82
4 / 5 .	Ep15_22_S_edge_ctor	11.9081	5.1036	46.9577	7.0595	1.3969	0.0598	0.1534	15.5264	0.1923	0.1274	88.4851	-18550	-26633	-33		25	2013-10-17 04:16:22	0.197977	0.144769	1.4929	0.577621	-20.3702	604.559

## Sheet: Glass data
DataSet/Point	Comment	MgO	Al2O3	Na2O	SiO2	K2O	Cr2O3	MnO	FeO	TiO2	CaO	P2O5	NiO	Total	X	Y	Z	Point#	Date	Helz T	T (averaged by crystal)
9 / 1 .	Ep1_15_wholegrain_A	8.5999	12.1114	2.1399	49.2914	0.519	0.0817	0.1505	11.4206	2.7124	11.6489	0.2492	0	98.9249	13560	-21197	-222	9	2013-10-30 16:14:31	1186.86
10 / 1 .	Ep1_15_wholegrain_B	8.884	12.2602	2.0597	49.3063	0.5875	0.1136	0.1794	10.9745	2.7032	11.4551	0.2291	0.0042	98.7568	13631	-21126	-222	10	2013-10-30 16:21:25	1192.57	1189.71
3 / 1 .	Ep3_2_SW_edge_A	5.1376	16.6528	2.9116	51.5017	0.5543	0	0.1432	9.4256	2.8358	12.1403	0.3299	0	101.633	9477	-28954	-138	3	2013-10-30 22:08:22	1117.27	1117.27
4 / 1 .	Ep3_4_wholegrain_A	6.5221	13.1526	2.4328	50.1635	0.6035	0.0372	0.1908	11.12	2.9668	11.8722	0.3787	0.0407	99.4808	12464	-29175	-157	4	2013-10-30 22:15:16	1145.09
5 / 1 .	Ep3_4_wholegrain_B	6.9874	13.054	2.3419	49.8967	0.6083	0	0.1023	11.1005	2.9419	11.6161	0.3229	0.0167	98.9886	12535	-29128	-157	5	2013-10-30 22:22:12	1154.45	1149.77
8 / 1 .	Ep3_6_N_edge_A	6.6476	13.2848	2.1434	48.4794	0.5612	0.1543	0.174	11.3401	2.9217	11.3792	0.3554	0.0275	97.4685	14781	-30907	-192	8	2013-10-30 22:43:01	1147.62	1147.62
9 / 1 .	Ep3_12_wholegrain_A	6.6224	13.469	2.3083	50.0783	0.6706	0.0356	0.1594	11.1017	2.9261	11.5851	0.3149	0	99.2713	17612	-33553	-259	9	2013-10-30 22:49:54	1147.11	1147.11
11 / 1 .	Ep3_16_wholegrain_A	7.3279	13.4671	2.2443	49.5354	0.6604	0.1102	0.1402	10.8663	3.0088	12.4284	0.2687	0.0376	100.095	10746	-31549	-155	11	2013-10-30 23:03:48	1161.29
12 / 1 .	Ep3_16_wholegrain_B	7.191	13.3595	2.3081	49.6349	0.5872	0.0379	0.2403	11.4149	2.8967	11.5775	0.3071	0.0595	99.6146	11343	-31079	-159	12	2013-10-30 23:10:39	1158.54	1159.91
13 / 1 .	Ep3_17_wholegrain_profile	7.0921	13.0606	2.2115	50.0828	0.6448	0.025	0.17	11.5883	2.9179	11.4416	0.3128	0	99.5474	9436	-31651	-150	13	2013-10-30 23:17:35	1156.55
13 / 2 .	Ep3_17_wholegrain_profile	7.3052	13.0319	2.2749	49.712	0.5946	0.0113	0.1654	11.6762	2.9044	11.2319	0.2886	0.0048	99.2013	9427.1	-31663.6	-150	14	2013-10-30 23:24:27	1160.83
13 / 3 .	Ep3_17_wholegrain_profile	7.1209	12.9501	2.2794	49.6081	0.6229	0.0245	0.2224	10.8652	2.9292	11.3889	0.2846	0.0341	98.3303	9418.3	-31676.3	-150	15	2013-10-30 23:31:06	1157.13
13 / 4 .	Ep3_17_wholegrain_profile	7.1787	12.944	2.3386	49.5051	0.6582	0.028	0.1513	10.7943	2.9074	11.3619	0.2568	0	98.1242	9409.4	-31688.9	-150	16	2013-10-30 23:37:43	1158.29
13 / 5 .	Ep3_17_wholegrain_profile	7.1193	13.0349	2.3632	49.6542	0.6675	0.0652	0.1769	11.53	2.898	11.238	0.2582	0.0059	99.0113	9400.6	-31701.6	-150	17	2013-10-30 23:44:18	1157.1
13 / 6 .	Ep3_17_wholegrain_profile	7.1561	13.194	2.3165	49.766	0.6362	0.0204	0.1073	11.0115	2.8955	11.3462	0.2378	0.0725	98.76	9391.7	-31714.2	-150	18	2013-10-30 23:50:59	1157.84
13 / 7 .	Ep3_17_wholegrain_profile	5.7392	14.8667	1.8845	43.0226	0.5692	0.0035	0.0988	10.2365	2.57	9.7747	0.3292	0.0603	89.155	9382.9	-31726.9	-150	19	2013-10-30 23:57:37
13 / 8 .	Ep3_17_wholegrain_profile	7.1543	13.1004	2.279	49.6108	0.6775	0.0789	0.2184	10.8392	2.9151	11.3034	0.3262	0.0496	98.5528	9374	-31739.5	-150	20	2013-10-31 00:04:15	1157.8
13 / 9 .	Ep3_17_wholegrain_profile	7.0367	13.0371	2.3842	49.623	0.646	0.038	0.1079	11.1938	2.904	11.2601	0.3071	0.0339	98.5719	9365.1	-31752.1	-150	21	2013-10-31 00:10:53	1155.44
13 / 10 .	Ep3_17_wholegrain_profile	7.2735	13.0337	2.2734	49.523	0.6492	0.0377	0.1453	11.248	2.9421	11.2834	0.2734	0.0318	98.7145	9356.3	-31764.8	-150	22	2013-10-31 00:17:31	1160.2
13 / 11 .	Ep3_17_wholegrain_profile	7.0902	13.0721	2.3374	49.4444	0.6441	0.0408	0.1011	11.3605	2.9005	11.2858	0.2404	0.0346	98.5519	9347.4	-31777.4	-150	23	2013-10-31 00:24:09	1156.51
13 / 12 .	Ep3_17_wholegrain_profile	7.1321	13.2143	2.2767	49.6313	0.6606	0.0818	0.1012	10.9637	2.9273	11.3898	0.2961	0	98.675	9338.6	-31790.1	-150	24	2013-10-31 00:30:49	1157.36
13 / 13 .	Ep3_17_wholegrain_profile	7.3088	13.1087	2.3321	49.4847	0.6202	0.0789	0.1895	10.8494	2.8908	11.2593	0.2851	0.0048	98.4124	9329.7	-31802.7	-150	25	2013-10-31 00:37:27	1160.91
13 / 14 .	Ep3_17_wholegrain_profile	7.2368	13.1654	2.2795	49.5894	0.5899	0.0876	0.1093	11.2477	2.9281	11.2993	0.2737	0.0078	98.8146	9320.9	-31815.4	-150	26	2013-10-31 00:44:06	1159.46
13 / 15 .	Ep3_17_wholegrain_profile	7.1372	13.0433	2.301	49.4258	0.6206	0	0.19	11.2113	2.9085	11.3831	0.3286	0.019	98.5682	9312	-31828	-150	27	2013-10-31 00:50:44	1157.46	1158.06
14 / 1 .	Ep3_23_wholegrain_A	6.4603	13.0494	2.3453	49.13	0.5372	0.141	0.1397	11.2502	2.9112	11.4189	0.2916	0.0193	97.6941	13706	-33603	-202	28	2013-10-31 00:57:24	1143.85	1143.85
15 / 1 .	Ep3_25_E_edge_A	6.7774	12.8572	2.1206	48.8757	0.5574	0.0861	0.2029	11.2667	2.8993	11.3785	0.3065	0.0326	97.3609	16010	-34658	-241	29	2013-10-31 01:04:15	1150.23
16 / 1 .	Ep3_25_E_edge_B	7.0907	13.1718	2.3071	49.0818	0.5778	0.0121	0.0808	10.9576	2.8718	11.243	0.2799	0.0314	97.7058	15981	-34702	-241	30	2013-10-31 01:11:06	1156.52	1153.37
5 / 1 .	Ep5_8_N_edge_A	7.1912	13.3521	2.3231	49.6442	0.5405	0.0517	0.1617	11.4511	2.9456	11.484	0.2576	0.0166	99.4194	-8835	-30332	-263	5	2013-10-31 02:06:24	1158.54
6 / 1 .	Ep5_8_N_edge_B	7.4137	13.0254	2.41	50.0651	0.5918	0.0279	0.2001	11.3907	2.8918	11.323	0.2742	0	99.6136	-8904	-30351	-263	6	2013-10-31 02:13:20	1163.02	1160.78
7 / 1 .	Ep5_11_N_edge_A	7.1704	12.8919	2.2697	49.4003	0.6044	0.122	0.121	10.9503	2.8651	11.1248	0.3607	0.0253	97.9059	-11061	-30727	-266	7	2013-10-31 02:20:14	1158.13	1158.13
8 / 1 .	Ep5_15_SW_edge_A	6.7477	13.1463	2.3009	49.5674	0.6544	0.0361	0.1555	11.4604	2.9537	11.6575	0.3176	0.0369	99.0342	-14619	-32932	-302	8	2013-10-31 02:27:05	1149.63
9 / 1 .	Ep5_15_SW_edge_B	7.3031	12.8349	2.2524	48.9	0.5521	0.1208	0.0914	11.0614	2.8238	10.9448	0.2491	0.1041	97.2379	-14633	-32831	-302	9	2013-10-31 02:33:59	1160.79	1155.21
10 / 1 .	Ep5_18_W_edge_A	6.5315	13.2767	2.4191	49.1183	0.6399	0.0137	0.184	11.0863	2.919	10.9903	0.3456	0.0839	97.6083	-13563	-30284	-258	10	2013-10-31 02:40:52	1145.28
11 / 1 .	Ep5_18_W_edge_B	7.2915	13.1587	2.1105	50.4801	0.6653	0.0267	0.1628	11.1	2.9116	11.2857	0.3408	0.0252	99.5587	-13451	-30286	-259	11	2013-10-31 02:47:42	1160.56	1152.92
1 / 1 .	Ep8_1_SW_edge_A	37.7814	1.4786	0.318	40.9387	0.0876	0.018	0.2992	16.8661	0.2718	1.1809	0.1308	0.2987	99.6699	-19775	-27358	-215	1	2013-10-31 03:29:04
2 / 1 .	Ep8_1_SW_edge_B	6.5959	13.1724	2.1781	49.0337	0.5754	0.0114	0.1885	11.6077	2.8576	11.5473	0.2847	0.0192	98.0719	-19726	-27348	-215	2	2013-10-31 03:35:55	1146.58	1146.58
3 / 1 .	Ep8_2_NE_edge_A	7.422	12.5267	2.1711	48.5844	0.5089	0.011	0.1876	11.8109	2.8622	11.5382	0.3083	0.023	97.9542	-20450	-26348	-203	3	2013-10-31 03:42:47	1163.18
4 / 1 .	Ep8_2_NE_edge_B	7.8434	12.7357	2.1119	49.2642	0.5827	0.0893	0.1856	10.7176	2.8136	11.2124	0.2623	0.037	97.8557	-20483	-26384	-203	4	2013-10-31 03:49:36	1171.65	1167.42
12 / 1 .	Ep8_11_E_edge_A	7.5294	13.1115	2.3007	49.7312	0.5774	0.0469	0.225	11.6408	2.8813	11.7637	0.2293	0.0002	100.037	-14820	-27955	-225	12	2013-10-31 04:44:32	1165.34
13 / 1 .	Ep8_11_E_edge_B	8.0382	12.5335	2.3246	49.1439	0.6103	0.0933	0.1852	10.8552	2.7962	11.062	0.3261	0	97.9683	-14897	-27990	-225	13	2013-10-31 04:51:30	1175.57	1170.45
14 / 1 .	Ep8_12_N_edge_A	6.6033	13.0737	2.3519	49.2832	0.6304	0.0552	0.1868	11.5263	2.8515	11.1014	0.2907	0	97.9544	-10752	-28352	-231	14	2013-10-31 04:58:23	1146.73
15 / 1 .	Ep8_12_N_edge_B	43.8327	0.0699	0.0355	40.2475	0.0192	0.0477	0.2106	14.7153	0.045	0.3534	0.1115	0.2384	99.9267	-10741	-28405	-229	15	2013-10-31 05:05:16		1146.73
5 / 1 .	Ep10_12_E and SE_edge_1_A	8.2681	12.8252	2.1709	48.9025	0.6511	0.0264	0.1674	11.3468	2.8307	11.328	0.2753	0	98.7924	-11323	-20469	-113	5	2013-10-30 17:37:41	1180.19	1180.19
1 / 1 .	Ep15_1_SW_edge_A	6.2733	12.799	2.1073	49.3162	0.4978	0.0423	0.1709	10.9413	2.8915	11.6515	0.3325	0	97.0236	22371	-28956	-337	1	2013-10-30 19:07:54	1140.09	1140.09
5 / 1 .	Ep15_5_wholegrain_A	6.9647	13.5157	2.2937	50.0475	0.6498	0.0885	0.215	11.0286	2.9666	11.6085	0.3078	0.0533	99.7394	18198	-28089	-248	5	2013-10-30 19:35:34	1153.99	1153.99
6 / 1 .	Ep15_10_N_edge_A	7.2858	12.937	2.4182	50.5474	0.6078	0.0846	0.2124	11.0739	2.8957	11.3027	0.244	0.0088	99.6182	16726	-28557	-213	6	2013-10-30 19:42:30	1160.44	1160.44
8 / 1 .	Ep15_12_NE_edge_A	7.244	13.7045	2.2038	49.7896	0.6224	0.0041	0.1411	11.1159	2.9079	11.2359	0.258	0.0037	99.2308	14388	-26716	-177	8	2013-10-30 19:56:22	1159.6	1159.6
13 / 1 .	Ep15_17_SW_edge_A	6.4719	12.6112	2.3259	49.3478	0.5908	0.0452	0.0801	11.1589	2.9158	11.5213	0.3737	0.0134	97.4559	10370	-26801	-141	13	2013-10-30 20:31:08	1144.09	1144.09
17 / 1 .	Ep15_22_S_edge_A	7.2549	13.193	2.1746	49.6266	0.6292	0.052	0.2151	11.3592	2.9164	11.5012	0.2116	0	99.1336	8015	-26336	-138	17	2013-10-30 20:58:50	1159.82	1159.82

## Sheet: IR(2014) data
Olivine No.	Olivine MgO	Melt Inclusion No.	Melt Inclusion MgO
1959-E1-ol05	48.6795	E1-05m1	13.14
1959-E1-ol05	48.6795	E1-05m2	13.414
1959-E1-ol07	47.8323	E1-07m1	12.007
1959-E1-ol09	47.9276	E1-09m1	12.374
1959-E1-ol10	47.2922	E1-10m1	11.329
1959-E1-ol12	48.263	E1-12m1	12.47
1959-E1-ol21	46.2862	E1-21m1	10.992
1959-E1-ol22	48.8543	E1-22m1	13.923
1959-E1-ol26	47.9799	E1-26m1	12.909
1959-E1-ol27	47.7967	E1-27m1	12.576
1959-E2-ol05	45.5041	E2-05m1	10.273
1959-E2-ol15	47.4112	E2-15m1	12.148
1959-E2-ol16	47.2286	E2-16m1	10.606
1959-E2-ol17	47.2187	E2-17m1	12.134
1959-E2-ol17	47.2187	E2-17m2	12.076
1959-E2-ol17	47.2187	E2-17m3	12.004
1959-E2-ol21	47.6439	E2-21m1	11.931
1959-E2-ol21	47.6439	E2-21m2	12.071
1959-E2-ol22	45.9745	E2-22m1	10.464
1959-E2-ol23	47.8933	E2-23m1	13.105
1959-E3-ol03	46.7975	E3-03m1	11.777
1959-E3-ol05	46.9225	E3-05m1	12.079
1959-E3-ol05	46.9225	E3-05m2	12.036
1959-E3-ol06	47.888	E3-06m1	12.782
1959-E3-ol13	47.9246	E3-13m1	12.891
1959-E3-ol14	47.1557	E3-14m1	11.749
1959-E3-ol15	43.7027	E3-15m1	7.995
1959-E3-ol15	43.7027	E3-15m2	7.998
1959-E3-ol19	47.0714	E3-19m1	11.843
1959-E3-ol19	47.0714	E3-19m2	11.664
1959-E3-ol19	47.0714	E3-19m3	12.186
1959-E3-ol25	47.5134	E3-25m1	11.973
1959-E3-ol28	45.3322	E3-28m1	9.912
1959-E5-ol09	47.8848	E5-09m1	12.761
1959-E5-ol09	47.8848	E5-05m2	13.04
1959-E5-ol10	47.0201	E5-10m1	11.953
1959-E5-ol10	47.0201	E5-10m2	11.631
1959-E5-ol10	47.0201	E5-10m3	11.841
1959-E5-ol10	47.0201	E5-10m4	11.521
1959-E5-ol14	47.3119	E5-14m1	12.241
1959-E5-ol18	47.9982	E5-18m1	12.326
1959-E6-ol08	47.2626	E6-08m1	12.149
1959-E6-ol09	47.5689	E6-09m1	12.705
1959-E6-ol09	47.5689	E6-09m2	12.657
1959-E6-ol10	47.3505	E6-10m1	11.918
1959-E6-ol10	47.3505	E6-10m2	11.87
1959-E6-ol10	47.3505	E6-10m3	11.721
1959-E6-ol12	47.0873	E6-12m1	12.002
1959-E6-ol13	46.3528	E6-13m1	10.941
1959-E6-ol14	47.7076	E6-14m1	12.539
1959-E7-ol03	47.7182	E7-03m1	12.264
1959-E7-ol04	45.721	E7-04m1	10.641
1959-E7-ol08	46.5802	E7-08m1	11.529
1959-E7-ol09	46.8236	E7-09m1	11.899
1959-E7-ol18	44.6698	E7-18m1	9.778
1959-E7-ol18	44.6698	E7-18m2	9.712
1959-E7-ol19	46.2328	E7-19m1	10.965
1959-E7-ol19	46.2328	E7-19m2	10.974
1959-E7-ol19	46.2328	E7-19m3	10.816
1959-E7-ol19	46.2328	E7-19m4	10.768
1959-E7-ol19	46.2328	E7-19m5	10.948
1959-E8-ol03	45.4743	E8-03m1	10.206
1959-E8-ol05	46.6425	E8-05m1	11.535
1959-E8-ol05	46.6425	E8-05m2	11.256
1959-E8-ol07	47.3397	E8-07m1	12.261
1959-E8-ol09	46.6332	E8-09m1	12.17
1959-E8-ol11	45.7827	E8-11m1	10.592
1959-E8-ol12	47.4358	E8-12m1	12.069
1959-E8-ol14	47.0789	E8-14m1	11.789
1959-E8-ol15	48.2287	E8-15m1	13.362
1959-E8-ol24	47.1095	E8-24m1	13.174
1959-E10-ol06	47.5863	E10-06m1	10.598
1959-E10-ol09	46.5682	E10-09m1	12.558
1959-E10-ol12	48.2556	E10-12m1	11.605
1959-E10-ol15	46.0005	E10-15m1	13.212
1959-E15-ol01	47.809	E15-01m1	10.656
1959-E15-ol01	47.809	E15-01m1	11.554
1959-E15-ol01	47.809	E15-01m2	10.641
1959-E15-ol01	47.809	E15-01m3	11.213
1959-E15-ol10	48.2059	E15-10m1	12.75
1959-E15-ol16	47.0145	E15-16m1	11
1959-E15-ol19	47.4764	E15-19m2	11.927
1959-E15-ol19	47.4764	E15-19m1	11.764
1959-E15-ol30	45.2155	E15-30m1	9.549
1959-E16-ol02	46.6291	E16-02m1	10.754
1959-E16-ol04	47.0232	E16-04m1	11.153
1959-E16-ol04	47.0232	E16-04m2	11.381
1959-E16-ol06	47.1665	E16-06m1	11.677
1959-E16-ol07	46.9544	E16-07m1	12.315
1959-E16-ol08	46.1088	E16-08m1	10.626
1959-E16-ol08	46.1088	E16-08m2	10.386
1959-E16-ol10	45.8227	E16-10m1	10.588
1959-E16-ol11	47.0096	E16-11m1	11.42
1959-E16-ol14	45.8808	E16-14m1	10.038
1959-E16-ol14	45.8808	E16-14m2	10.264
1959-E16-ol17	46.8753	E16-17m1	11.217
1959-E16-ol17	46.8753	E16-17m2	11.346
1959-E16-ol18	46.9685	E16-18m1	11.819
1959-E16-ol26	46.0551	E16-26m1	10.56
